# Supplementary material
Source: publisher figshare collection journal article supplement (https://sage.figshare.com/ndownloader/files/22784201)
Supplement: Supplementary file 1 [file 22784201]

## Supplementary information for manuscript: From Policy Interest to Media

### Appearance: Interest Group Activity and Media Bias

*Figure SI-1: Response rates across different types of interest groups by country*

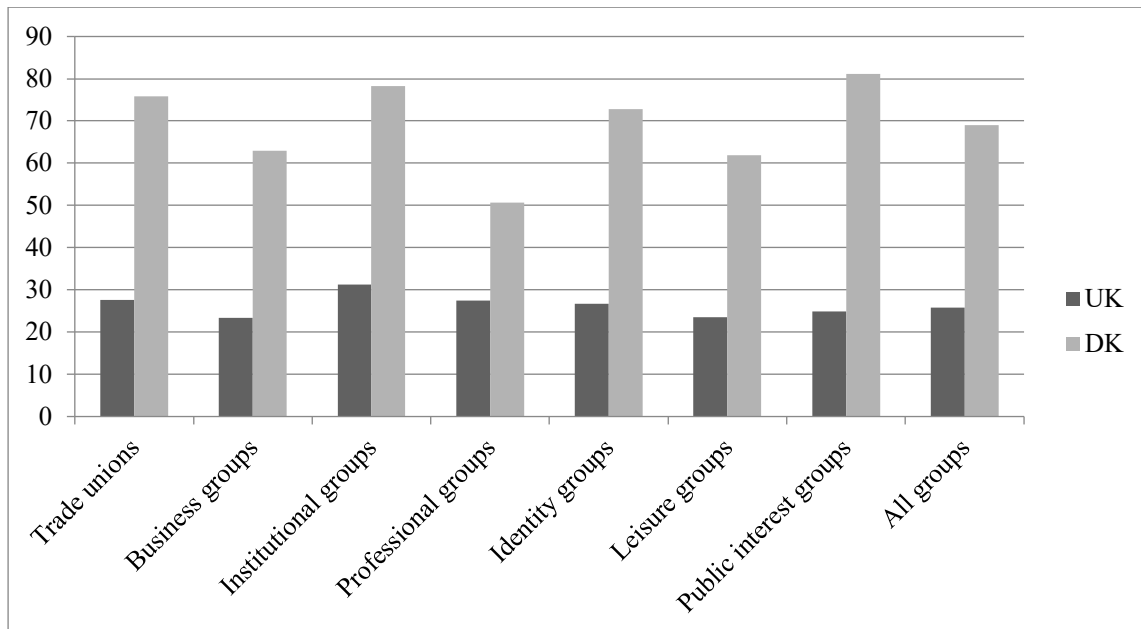

**Note:** Trade unions, business groups and professional groups are categorized as economic groups with response rates of 25 percent in the UK survey and 65 percent in the Danish. Leisure groups, public interest groups and identity groups are categorized as citizen groups with response rate of 25 percent in the UK survey and 73 percent in the Danish.

***Table SI-1: Matching of policy areas in survey and media coding***

| <b>Survey question</b>                         | <b>Media coding</b>                                                                                                           | <b>Policy regulation</b> |
|------------------------------------------------|-------------------------------------------------------------------------------------------------------------------------------|--------------------------|
| Labour market policy                           | Labour                                                                                                                        | Economic                 |
| Urban and housing policy                       | Housing issues                                                                                                                | General                  |
| Research, technology and communications policy | Research, technology, IT, telecommunications and mass media                                                                   | Public sector            |
| Defense and security policy                    | Defense, security, disasters and disaster relief                                                                              | Public sector            |
| Industrial and consumer policy                 | Industrial/business and consumer issues                                                                                       | Economic                 |
| EU policy                                      | EU                                                                                                                            | General                  |
| Refugee and immigrant policy                   | Refugees and immigrants                                                                                                       | General                  |
| Religious policy                               | Church issues                                                                                                                 | Public sector            |
| Local government and regional policy           | Relations between central and local actors including regional politics and local politics<br><br>The public sector in general | General                  |
| Culture and sports policy                      | Culture, sports and gambling                                                                                                  | Public sector            |
| Agriculture, fishery and food policy           | Agriculture, fishing industry and foods                                                                                       | Economic                 |
| Environment and energy policy                  | Environment<br><br>Energy                                                                                                     | Economic                 |
| Monetary, fiscal and tax policy                | Macro economics                                                                                                               | General                  |
| Law and order/justice policy                   | Personal and civil rights<br><br>Legal affairs                                                                                | General                  |
| Social affairs and families policy             | Social policy and family issues                                                                                               | Public sector            |

|                                   |                                                                                                              |               |
|-----------------------------------|--------------------------------------------------------------------------------------------------------------|---------------|
| Health policy                     | Health                                                                                                       | Public sector |
| Traffic and infrastructure policy | Traffic and infrastructure                                                                                   | Public sector |
| Education policy                  | Education                                                                                                    | Public sector |
| Foreign affairs (excluding EU)    | Foreign issues and relations to other countries<br><br>Greenland and the Faroe Islands/National dependencies | General       |
| Missing                           | The royal family<br><br>Politics in general<br><br>Miscellaneous                                             |               |

**Table SI-2: Diversity in the group of interest groups active in a policy area and in the type of interest being reported on in relation to the same policy areas across policy area and country**

| UK                     |              |          |                   |          |             |          |                    |          |        |          |           |          |         |          |
|------------------------|--------------|----------|-------------------|----------|-------------|----------|--------------------|----------|--------|----------|-----------|----------|---------|----------|
|                        | Labor market |          | Business/consumer |          | Agriculture |          | Environment/energy |          | Health |          | Education |          | Justice |          |
|                        | Active       | Appeared | Active            | Appeared | Active      | Appeared | Active             | Appeared | Active | Appeared | Active    | Appeared | Active  | Appeared |
| Trade unions           | 13           | 39       | 7                 | 10       | 3           | 3        | 3                  | 2        | 6      | 6        | 5         | 17       | 6       | 12       |
| Business groups        | 25           | 13       | 51                | 44       | 45          | 38       | 38                 | 24       | 10     | 8        | 12        | 3        | 16      | 6        |
| Groups of institutions | 14           | 9        | 11                | 3        | 6           | 3        | 10                 | 3        | 10     | 4        | 17        | 29       | 4       | 4        |
| Professional groups    | 15           | 12       | 10                | 12       | 9           | 3        | 14                 | 8        | 20     | 29       | 23        | 12       | 18      | 8        |
| Identity groups        | 7            | 11       | 3                 | 6        | 2           | 3        | 3                  | 1        | 20     | 19       | 12        | 10       | 14      | 14       |
| Leisure groups         | 1            | 1        | 0                 | 4        | 9           | 10       | 4                  | 6        | 2      | 6        | 3         | 7        | 6       | 14       |
| Public interest groups | 25           | 14       | 17                | 21       | 25          | 43       | 28                 | 56       | 32     | 28       | 27        | 22       | 37      | 42       |
| Total                  | 95           | 76       | 87                | 117      | 64          | 40       | 118                | 88       | 158    | 142      | 172       | 69       | 107     | 163      |
| Denmark                |              |          |                   |          |             |          |                    |          |        |          |           |          |         |          |
| Trade unions           | 49           | 63       | 21                | 14       | 8           | 7        | 12                 | 7        | 23     | 24       | 34        | 29       | 21      | 25       |
| Business groups        | 23           | 22       | 50                | 61       | 52          | 63       | 49                 | 37       | 14     | 12       | 16        | 11       | 29      | 18       |
| Groups of institutions | 6            | 2        | 4                 | 1        | 3           | 3        | 5                  | 8        | 6      | 7        | 15        | 22       | 3       | 4        |
| Professional groups    | 0            | 1        | 1                 | 2        | 0           | 0        | 1                  | 2        | 12     | 14       | 7         | 12       | 2       | 6        |
| Identity groups        | 13           | 7        | 7                 | 6        | 4           | 0        | 7                  | 2        | 29     | 34       | 16        | 20       | 16      | 13       |
| Leisure groups         | 1            | 0        | 3                 | 6        | 13          | 7        | 9                  | 8        | 4      | 0        | 4         | 2        | 8       | 11       |
| Public interest groups | 8            | 4        | 14                | 9        | 20          | 20       | 17                 | 36       | 14     | 10       | 8         | 5        | 22      | 23       |
| Total                  | 184          | 82       | 184               | 139      | 97          | 30       | 166                | 59       | 170    | 92       | 237       | 65       | 146     | 113      |

Note: The 'active' column include all groups in the survey claiming to be active in the relevant policy area. The 'appeared' column include all groups from the entire population appearing at least once in the newspapers on the relevant policy .

**Figure SI-2: Robustness of lower media diversity, limiting the group of interest groups active on a policy field to those ‘very active’**

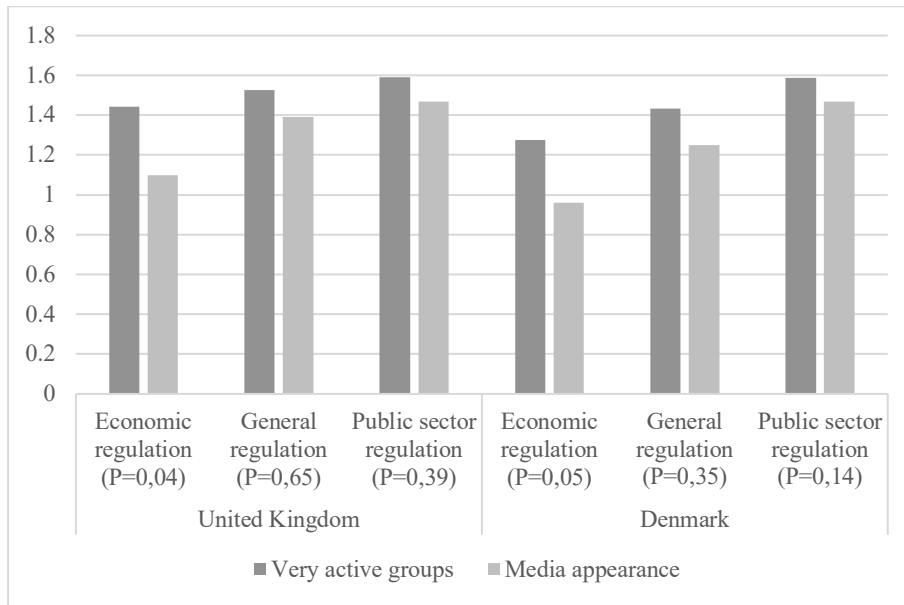

*Note:* The figure reports average measures of Shannon’s H across the policy areas classified as: 1) economic regulation, 2) general regulation and 3) public sector regulation in each country. P-values are estimated for differences in the average diversity between the set of interest groups reporting to be very active in a policy area and the groups of interest groups appearing in the media (two-sided t-tests).

**Figure SI-3: Robustness of lower media diversity, limiting the group of interest groups active on a policy area to those explicitly seeking media attention.**

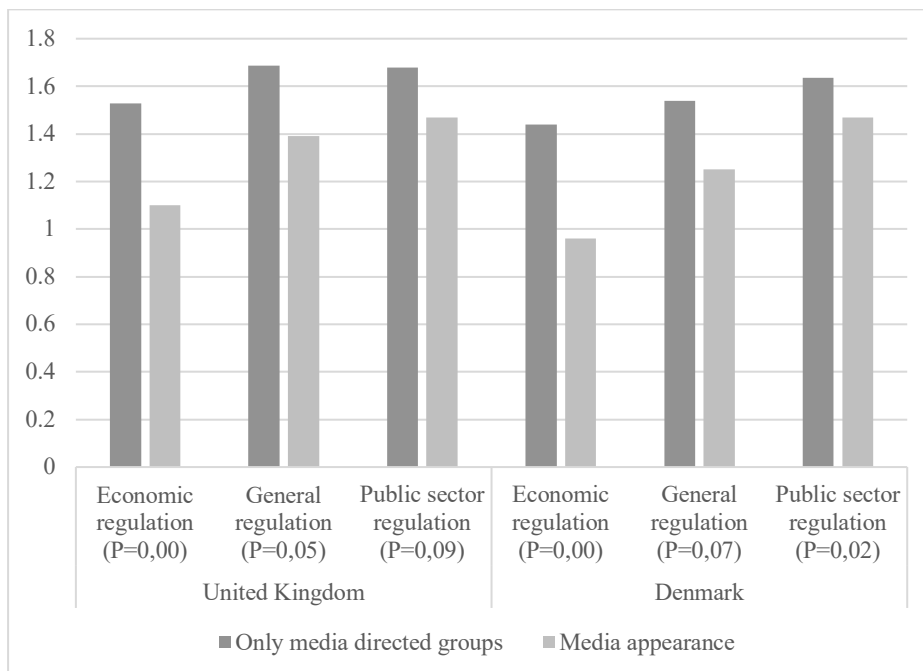

*Note:* The figure reports average measures of Shannon’s H across the policy areas classified as: 1) economic regulation, 2) general regulation and 3) public sector regulation in each country. P-values are estimated for differences in the average diversity between the set of interest groups reporting to be active on the relevant policy area *and* seek to influence the media agenda to some or a large degree and the set of interest groups appearing in the media (two-sided t-tests).

**Table SI-3: Robustness analyses with different policy populations**

|                                      |                                    | <i>Model 1: Only media directed groups</i> |                                  |          |                       |                                  |          | <i>Model 2: Only 'very interested' in policy area</i> |                                  |          |                       |                                  |          |
|--------------------------------------|------------------------------------|--------------------------------------------|----------------------------------|----------|-----------------------|----------------------------------|----------|-------------------------------------------------------|----------------------------------|----------|-----------------------|----------------------------------|----------|
|                                      |                                    | <i>Counts</i>                              |                                  |          | <i>Zero-inflation</i> |                                  |          | <i>Counts</i>                                         |                                  |          | <i>Zero-inflation</i> |                                  |          |
|                                      |                                    | Coef<br>ficie<br>nt                        | Robu<br>st<br>std.<br>error<br>s | <i>p</i> | Coef<br>ficie<br>nt   | Robu<br>st<br>std.<br>error<br>s | <i>P</i> | Coef<br>ficie<br>nt                                   | Robu<br>st<br>std.<br>error<br>s | <i>p</i> | Coef<br>ficie<br>nt   | Robu<br>st<br>std.<br>error<br>s | <i>p</i> |
| Resources                            | <i>Political staff, log.</i>       | 0.62                                       | 0.05                             | 0.000    | -0.71                 | 0.11                             | 0.000    | 0.69                                                  | 0.06                             | 0.000    | -0.72                 | 0.18                             | 0.000    |
| Group type<br>(Ref=economic)         | <i>Citizen group</i>               | 0.31                                       | 0.29                             | 0.284    | -0.19                 | 0.59                             | 0.750    | 0.26                                                  | 0.29                             | 0.362    | -0.18                 | 1.06                             | 0.865    |
| Policy area<br>(Ref = economic reg.) | <i>General regulation</i>          | -0.60                                      | 0.19                             | 0.002    | 1.02                  | 0.30                             | 0.001    | -0.44                                                 | 0.23                             | 0.052    | 0.55                  | 0.43                             | 0.202    |
|                                      | <i>Public sector regulation</i>    | -0.72                                      | 0.26                             | 0.006    | -0.11                 | 0.44                             | 0.811    | -0.57                                                 | 0.27                             | 0.037    | -1.07                 | 0.81                             | 0.186    |
| Country<br>(Ref= UK)                 | <i>Denmark</i>                     | 0.17                                       | 0.20                             | 0.405    | -1.44                 | 0.35                             | 0.000    | 0.34                                                  | 0.22                             | 0.121    | -1.57                 | 0.48                             | 0.001    |
| Interaction                          | <i>UK#citizen group</i>            | -0.81                                      | 0.36                             | 0.025    | -0.33                 | 0.58                             | 0.571    | -0.79                                                 | 0.36                             | 0.029    | 0.04                  | 0.77                             | 0.955    |
|                                      | <i>Economic reg.#citizen group</i> | -0.26                                      | 0.40                             | 0.526    | 0.87                  | 0.68                             | 0.198    | -0.15                                                 | 0.40                             | 0.716    | 0.59                  | 1.11                             | 0.592    |
|                                      | <i>General reg.#citizen group</i>  | -0.32                                      | 0.44                             | 0.473    | -0.39                 | 0.72                             | 0.587    | -0.15                                                 | 0.46                             | 0.738    | -0.52                 | 1.22                             | 0.670    |
| Constant                             |                                    | -0.85                                      | 0.39                             | 0.032    | 1.85                  | 0.72                             | 0.010    | -0.90                                                 | 0.41                             | 0.029    | 1.76                  | 1.19                             | 0.139    |
|                                      |                                    | N = 3,090 (687 clusters)                   |                                  |          |                       |                                  |          | N = 1,668 (726 clusters)                              |                                  |          |                       |                                  |          |

*Table SI-4: Robustness analyses with standard errors clustered for policy areas*

|                                      |                                    | Logistic regression     |                    |          | Zero-inflated negative binomial regression |                    |          |                |                    |          |
|--------------------------------------|------------------------------------|-------------------------|--------------------|----------|--------------------------------------------|--------------------|----------|----------------|--------------------|----------|
|                                      |                                    |                         |                    |          | Counts                                     |                    |          | Zero-inflation |                    |          |
|                                      |                                    | Odds ratio              | Robust std. errors | <i>p</i> | Coefficient                                | Robust std. errors | <i>p</i> | Coefficient    | Robust std. errors | <i>p</i> |
| Resources                            | <i>Political staff, log.</i>       | 2.05                    | 0.19               | 0.000    | 0.66                                       | 0.07               | 0.000    | -0.69          | 0.14               | 0.000    |
| Group type<br>(Ref=economic)         | <i>Citizen group</i>               | 1.30                    | 0.27               | 0.199    | 0.35                                       | 0.30               | 0.235    | 0.06           | 0.51               | 0.913    |
| Policy area<br>(Ref = economic reg.) | <i>General regulation</i>          | 0.40                    | 0.20               | 0.061    | -0.61                                      | 0.36               | 0.093    | 0.96           | 0.67               | 0.150    |
|                                      | <i>Public sector regulation</i>    | 0.69                    | 0.26               | 0.334    | -0.68                                      | 0.25               | 0.007    | -0.32          | 0.74               | 0.672    |
| Country (Ref= UK)                    | <i>Denmark</i>                     | 2.36                    | 0.31               | 0.000    | 0.13                                       | 0.13               | 0.319    | -1.42          | 0.28               | 0.000    |
| Interaction                          | <i>UK#citizen group</i>            | 0.68                    | 0.14               | 0.063    | -0.92                                      | 0.37               | 0.013    | -0.28          | 0.51               | 0.585    |
|                                      | <i>Economic reg.#citizen group</i> | 0.58                    | 0.34               | 0.360    | -0.24                                      | 0.41               | 0.552    | 0.60           | 0.86               | 0.484    |
|                                      | <i>General reg.#citizen group</i>  | 1.12                    | 0.48               | 0.800    | -0.15                                      | 0.51               | 0.772    | -0.49          | 0.74               | 0.508    |
| Constant                             |                                    | 0.04                    | 0.02               | 0.000    | -1.03                                      | 0.40               | 0.011    | -1.62          | 0.77               | 0.035    |
|                                      |                                    | N = 3,670 (19 clusters) |                    |          |                                            |                    |          |                |                    |          |
